# Supplementary material
Source: publisher site journal article supplement (doi:10.18632/aging.206382)
Supplement: Supplementary file 1 [file aging-v18i1-206382-supplementary-material-SD2.xlsx]

## Sheet: Sheet1
Table 1A
Mouse						Human
GO Biological Process
Ontology	Term	Count	Gene Ratio	P.value	pFDR	Ontology	Term	Count	Gene Ratio	P.value	pFDR
BP	extracellular matrix organization (GO:0030198)	116	0.386667	8.32329e-44	3.87616e-40	BP	actin-myosin filament sliding (GO:0033275)	8	0.210526	3.73085e-08	2.86697e-05
BP	extracellular structure organization (GO:0043062)	95	0.439815	1.10081e-41	2.56324e-38	BP	pyruvate metabolic process (GO:0006090)	9	0.163636	5.29613e-08	2.86697e-05
BP	external encapsulating structure organization (GO:0045229)	95	0.437788	1.78665e-41	2.77348e-38	BP	glycolytic process (GO:0006096)	7	0.241379	9.86929e-08	4.00693e-05
BP	collagen fibril organization (GO:0030199)	46	0.516854	1.46308e-24	1.70339e-21	BP	mitochondrial membrane organization (GO:0007006)	7	0.21875	2.05513e-07	5.64256e-05
BP	regulation of cell migration (GO:0030334)	107	0.262255	5.86315e-24	5.46093e-21	BP	muscle contraction (GO:0006936)	12	0.0930233	2.08469e-07	5.64256e-05
BP	axon guidance (GO:0007411)	61	0.300493	3.06447e-17	1.7839e-14	BP	mitochondrial ATP synthesis coupled electron transport (GO:0042775)	9	0.126761	5.12763e-07	0.000104091
BP	regulation of angiogenesis (GO:0045765)	56	0.275862	3.65517e-14	1.54747e-11	BP	gluconeogenesis (GO:0006094)	7	0.170732	1.236e-06	0.000154404
BP	axonogenesis (GO:0007409)	59	0.245833	1.74288e-12	6.76383e-10	BP	striated muscle contraction (GO:0006941)	7	0.12963	8.36957e-06	0.000906145
BP	regulation of endothelial cell proliferation (GO:0001936)	30	0.326087	3.73151e-10	9.14612e-08	BP	sarcomere organization (GO:0045214)	5	0.178571	3.47123e-05	0.00313182
BP	regulation of cell population proliferation (GO:0042127)	123	0.160995	5.7095e-10	1.32946e-07	BP	mitochondrion organization (GO:0007005)	10	0.0571429	0.000151078	0.0122675
KEGG Pathway
Ontology	Term	Count	Gene Ratio	P.value	pFDR	Ontology	Term	Count	Gene Ratio	P.value	pFDR
KEGG	ECM-receptor interaction	36	0.433735	2.26766e-16	3.24275e-14	KEGG	Prion disease	22	0.0805861	2.7916e-11	3.73033e-09
KEGG	PI3K-Akt signaling pathway	81	0.226891	1.58974e-14	1.51555e-12	KEGG	Parkinson disease	21	0.0843373	3.40669e-11	3.73033e-09
KEGG	Regulation of actin cytoskeleton	51	0.235023	3.13423e-10	1.79278e-08	KEGG	Huntington disease	21	0.0686275	1.52358e-09	7.17277e-08
KEGG	Axon guidance	43	0.238889	4.47214e-09	1.82719e-07	KEGG	Alzheimer disease	23	0.0623306	1.59916e-09	7.17277e-08
KEGG	Rap1 signaling pathway	47	0.22488	7.01412e-09	2.50755e-07	KEGG	Glycolysis / Gluconeogenesis	11	0.164179	1.63762e-09	7.17277e-08
KEGG	Protein digestion and absorption	27	0.3	2.11512e-08	6.61699e-07	KEGG	Pathways of neurodegeneration	26	0.0547368	2.09362e-09	7.64173e-08
KEGG	AMPK signaling pathway	27	0.214286	2.69889e-05	0.000454049	KEGG	Amyotrophic lateral sclerosis	18	0.0494505	2.91476e-06	7.97915e-05
KEGG	p53 signaling pathway	18	0.253521	5.85569e-05	0.000930404	KEGG	Thermogenesis	12	0.0517241	8.75737e-05	0.00196721
KEGG	MAPK signaling pathway	48	0.163265	7.25394e-05	0.00104776	KEGG	Oxidative phosphorylation	9	0.0676692	8.98267e-05	0.00196721
KEGG	PPAR signaling pathway	20	0.235294	7.32697e-05	0.00104776	KEGG	Pyruvate metabolism	5	0.106383	0.000438556	0.00738799
