# Supplementary material
Source: publisher site journal article supplement (doi:10.18632/aging.206382)
Supplement: Supplementary file 2 [file aging-v18i1-206382-supplementary-material-SD1.pdf]

SUPPLEMENTARY FIGURES

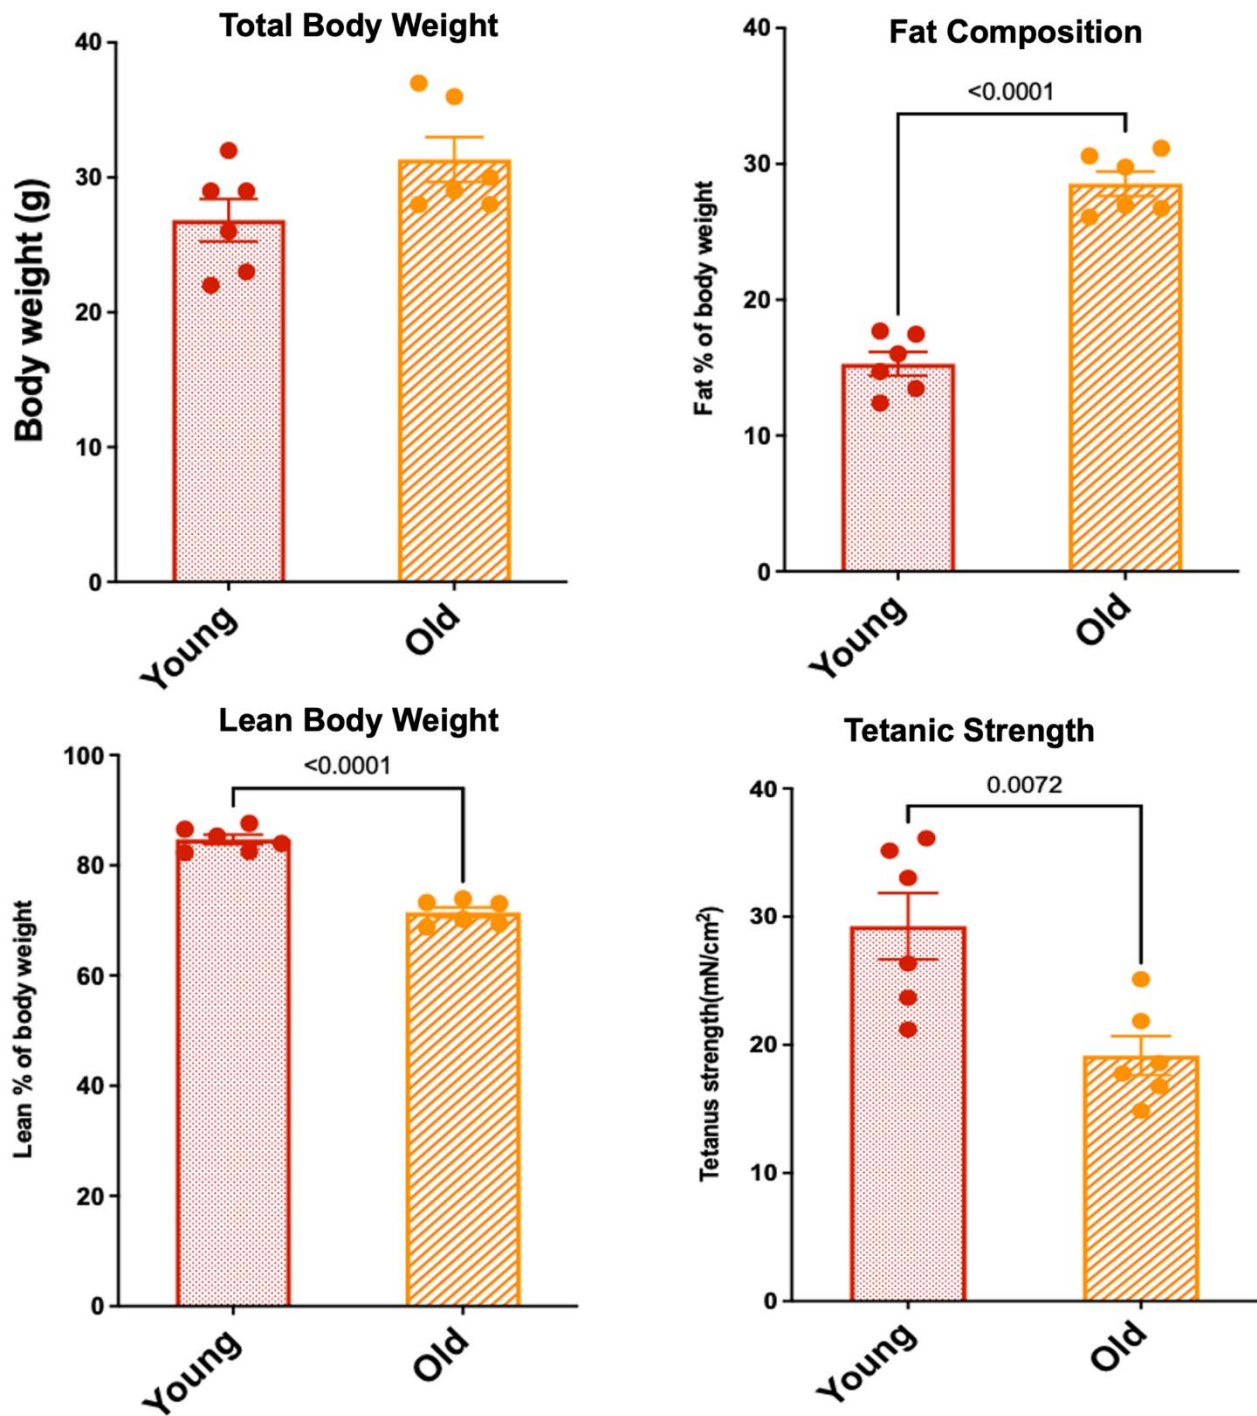

**Supplementary Figure 1.** Schematic of phenotypic analyses on murine Nuclear Magnetic Resonance (NMR) imaging (A–C) and *in situ* force testing (D). Young vs old mice in comparison of (A) total body weight (B) fat composition (C) lean body weight (D) tetanic strength.

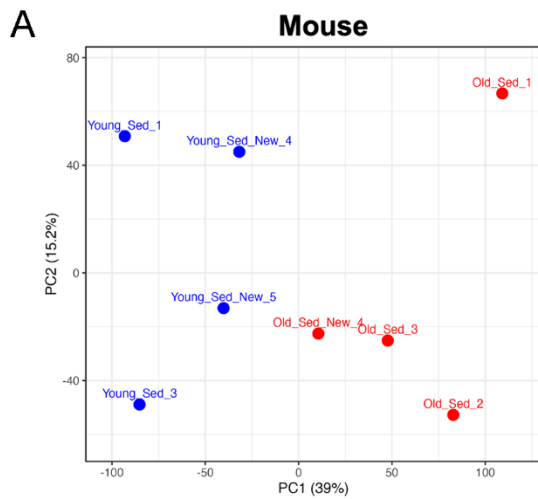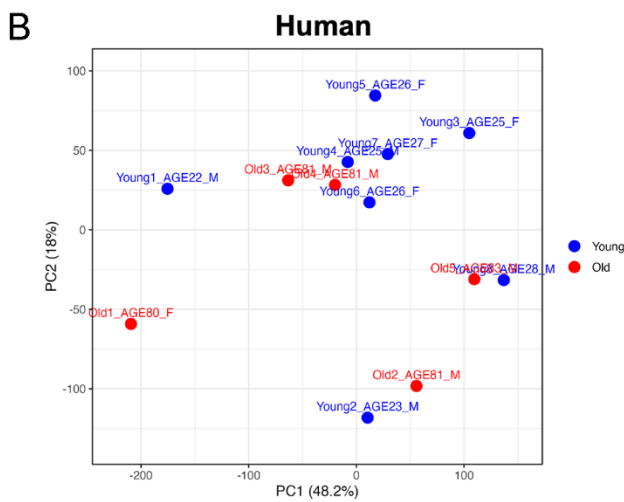

**C**

| PCA Label       | Heatmap Label | Species |
|-----------------|---------------|---------|
| Young_Sed_1     | Young1        | Mouse   |
| Young_Sed_3     | Young2        | Mouse   |
| Young_Sed_New_4 | Young3        | Mouse   |
| Young_Sed_New_5 | Young4        | Mouse   |
| Old_Sed_1       | Old1          | Mouse   |
| Old_Sed_2       | Old2          | Mouse   |
| Old_Sed_3       | Old3          | Mouse   |
| Old_Sed_New_4   | Old4          | Mouse   |
| Young1_AGE22_M  | Young1        | Human   |
| Young2_AGE23_M  | Young2        | Human   |
| Young3_AGE25_F  | Young3        | Human   |
| Young4_AGE25_M  | Young4        | Human   |
| Young5_AGE26_F  | Young5        | Human   |
| Young6_AGE26_F  | Young6        | Human   |
| Young7_AGE27_F  | Young7        | Human   |
| Young8_AGE28_M  | Young8        | Human   |
| Old1_AGE80_F    | Old1          | Human   |
| Old2_AGE81_M    | Old2          | Human   |
| Old3_AGE81_M    | Old3          | Human   |
| Old4_AGE81_M    | Old4          | Human   |
| Old5_AGE83_M    | Old5          | Human   |

**Supplementary Figure 2. Principal component analysis and sample label correspondence.** (A) PCA of mouse skeletal muscle RNA sequencing data (young, blue, n=4; old, red, n=4) showing clear age-group separation along PC1 (39% variance explained). (B) PCA of human skeletal muscle data (young, blue, n=8; old, red, n=5) demonstrating substantial inter-sample overlap along PC1 (48.2% variance explained), reflecting high inter-individual biological variability. (C) Sample label correspondence between PCA and heatmap visualizations in Figure 4.
